# Supplementary material
Source: PubMed Central journal article supplement (PMC4520766)
Supplement: NIHMS702566-supplement-2.pdf [file NIHMS702566-supplement-2.pdf]

R.P. Hobbs et al.

Keratin 17 regulates Aire to promote skin tumorigenesis

Supplementary Table 1. Summary of "Inflammatory Cytokine and Receptors" array

| Target | HPV16 <sup>tg/+</sup> vs. Wildtype | HPV16 <sup>tg/+</sup> ;Krt17 <sup>-/-</sup> vs. HPV16 <sup>tg</sup> |
|--------|------------------------------------|---------------------------------------------------------------------|
| Cxcl11 | 2.29                               | -2.93                                                               |
| Ccr8   | 1.97                               | -2.58                                                               |
| Il13   | 2.50                               | -2.48                                                               |
| Ccl4   | 18.25                              | -2.18                                                               |
| Ccl22  | 2.26                               | -2.12                                                               |
| Il8rb  | 5.52                               | -1.99                                                               |
| Ccl3   | 9.55                               | -1.80                                                               |
| Xcr1   | 2.64                               | -1.79                                                               |
| Ccr2   | 2.55                               | -1.73                                                               |
| Ccl1   | 3.71                               | -1.72                                                               |
| Ccr7   | 5.36                               | -1.70                                                               |
| Il2rg  | 1.67                               | -1.66                                                               |
| Ccr5   | 6.88                               | -1.64                                                               |
| Ccl5   | 4.98                               | -1.56                                                               |
| Ifng   | 4.93                               | -1.39                                                               |
| Ccr1   | 9.46                               | -1.37                                                               |
| Ccl8   | 21.63                              | -1.31                                                               |
| Cxcl5  | 91.43                              | -1.27                                                               |
| Tnf    | 1.61                               | -1.21                                                               |
| Il5ra  | 4.39                               | -1.19                                                               |
| Itgam  | 1.96                               | -1.12                                                               |
| Il10   | 5.95                               | -1.12                                                               |

HPV16<sup>tg</sup>-induced, Krt17-dependent

| Target | HPV16 <sup>tg/+</sup> vs. Wildtype | HPV16 <sup>tg/+</sup> ;Krt17 <sup>-/-</sup> vs. HPV16 <sup>tg</sup> |
|--------|------------------------------------|---------------------------------------------------------------------|
| Cxcl10 | 250.64                             | 4.31                                                                |
| Il1b   | 90.08                              | 0.15                                                                |
| Ccl20  | 37.46                              | 0.34                                                                |
| Cxcl1  | 32.49                              | 0.13                                                                |
| Il1f6  | 28.14                              | 0.31                                                                |
| Cxcl9  | 27.57                              | 1.80                                                                |
| Cxcl13 | 14.17                              | 1.51                                                                |
| Ccl17  | 13.26                              | 1.11                                                                |
| Ccl12  | 10.78                              | 0.29                                                                |
| Ccl7   | 8.83                               | 1.32                                                                |
| Ccl19  | 8.31                               | 0.15                                                                |
| Il1a   | 8.17                               | 0.34                                                                |
| Il4    | 6.42                               | 1.03                                                                |
| Casp1  | 4.40                               | 0.47                                                                |
| Il1f8  | 4.32                               | 1.18                                                                |
| Cd40lg | 4.11                               | -0.23                                                               |
| Itgb2  | 3.73                               | 0.12                                                                |
| Spp1   | 3.25                               | -0.01                                                               |
| Il20   | 3.06                               | -0.24                                                               |
| Hprt1  | 2.97                               | 1.67                                                                |
| Ccl2   | 2.69                               | 1.20                                                                |
| Ccr6   | 2.46                               | 0.03                                                                |
| Cxcr3  | 2.44                               | 0.01                                                                |
| Ccl11  | 2.38                               | -0.03                                                               |
| Il3    | 2.21                               | 0.11                                                                |
| Ccr3   | 2.20                               | -0.13                                                               |
| Cxcl15 | 2.19                               | 0.29                                                                |
| Scye1  | 2.05                               | 1.64                                                                |
| Il6st  | 2.00                               | -0.67                                                               |
| Ccl9   | 1.75                               | 0.01                                                                |
| Il18   | 1.74                               | 1.17                                                                |
| Ccl25  | 1.71                               | 1.90                                                                |
| Ccl6   | 1.67                               | -0.12                                                               |

HPV16<sup>tg</sup>-induced, Krt17-independent

| Target   | HPV16 <sup>tg/+</sup> vs. Wildtype |
|----------|------------------------------------|
| Hsp90a   | 1.41                               |
| Lta      | 1.31                               |
| Tnfrsf1b | 1.05                               |
| Cxcl12   | 0.00                               |
| Il13ra1  | -1.11                              |
| Mif      | -1.13                              |
| C3       | -1.15                              |
| Cxcr5    | -1.18                              |
| Il1r1    | -1.21                              |
| Il10rb   | -1.21                              |
| Abcf1    | -1.21                              |
| Ltb      | -1.22                              |
| Gapdh    | -1.23                              |
| Il2rb    | -1.27                              |
| Il1r2    | -1.43                              |
| Gusb     | -1.44                              |
| Il17b    | -1.50                              |
| Ccr4     | -1.50                              |
| Il11     | -1.51                              |
| Crp      | -1.70                              |
| Il10ra   | -1.81                              |
| Il15     | -1.85                              |
| Cx3cl1   | -1.89                              |
| Ccr9     | -1.91                              |
| Pf4      | -2.08                              |
| Tollip   | -2.13                              |
| Tgfb1    | -2.21                              |
| Actb     | -2.37                              |
| Il6ra    | -2.38                              |
| Ccl24    | -2.61                              |
| Tnfrsf1a | -2.98                              |
| Ccr10    | -3.10                              |
| Bcl6     | -3.45                              |
| Il16     | -4.58                              |

Not induced by HPV16<sup>tg</sup>

R.P. Hobbs et al.

Keratin 17 regulates Aire to promote skin tumorigenesis

Supplementary Table 2. Summary of "NfκB Signaling Pathway" array

| Target | HPV16 <sup>tg/+</sup> vs. Wildtype | HPV16 <sup>tg/+</sup> ;Krt17 <sup>-/-</sup> vs. HPV16 <sup>tg</sup> | HPV16 <sup>tg</sup> -induced, Krt17-dependent |
|--------|------------------------------------|---------------------------------------------------------------------|-----------------------------------------------|
| Il6    | 6.20                               | -1.73                                                               |                                               |
| Gja1   | 3.14                               | -1.59                                                               |                                               |

| Target  | HPV16 <sup>tg/+</sup> vs. Wildtype | HPV16 <sup>tg/+</sup> ;Krt17 <sup>-/-</sup> vs. HPV16 <sup>tg</sup> | HPV16 <sup>tg</sup> -induced, Krt17-independent |
|---------|------------------------------------|---------------------------------------------------------------------|-------------------------------------------------|
| Il1b    | 13.67                              | 1.33                                                                |                                                 |
| Csf2    | 13.44                              | 1.17                                                                |                                                 |
| Il1a    | 5.02                               | 1.03                                                                |                                                 |
| Bcl3    | 4.78                               | 1.77                                                                |                                                 |
| Il10    | 3.66                               | 1.07                                                                |                                                 |
| Ifng    | 3.45                               | 1.23                                                                |                                                 |
| Gapdh   | 1.83                               | 1.04                                                                |                                                 |
| Casp1   | 1.75                               | 1.37                                                                |                                                 |
| Stat1   | 1.74                               | -1.09                                                               |                                                 |
| Tnfsf14 | 1.56                               | -1.45                                                               |                                                 |
| Nlrp12  | 1.53                               | 3.60                                                                |                                                 |
| Cd40    | 1.53                               | -1.32                                                               |                                                 |

| Target  | HPV16 <sup>tg/+</sup> vs. Wildtype | Not induced by HPV16 <sup>tg</sup> |
|---------|------------------------------------|------------------------------------|
| Fasl    | 1.49                               |                                    |
| Csf3    | 1.47                               |                                    |
| Hprt1   | 1.38                               |                                    |
| Myd88   | 1.34                               |                                    |
| Fadd    | 1.33                               |                                    |
| Tlr1    | 1.31                               |                                    |
| Tnfsf10 | 1.15                               |                                    |
| Slc20a1 | 1.09                               |                                    |

| Target   | HPV16 <sup>tg/+</sup> vs. Wildtype | Not induced by HPV16 <sup>tg</sup> |
|----------|------------------------------------|------------------------------------|
| Tnfrsf1a | 1.09                               |                                    |
| Ltbr     | 1.08                               |                                    |
| Nfkb1    | 1.03                               |                                    |
| Tnf      | -1.01                              |                                    |
| Irf1     | -1.04                              |                                    |
| Traf3    | -1.10                              |                                    |
| Rela     | -1.10                              |                                    |
| Akt1     | -1.11                              |                                    |
| Hsp90ab1 | -1.15                              |                                    |
| Rel      | -1.16                              |                                    |
| Tnfrsf1b | -1.18                              |                                    |
| Icam1    | -1.22                              |                                    |
| Zap70    | -1.24                              |                                    |
| Bcl10    | -1.27                              |                                    |
| Nod1     | -1.27                              |                                    |
| Eif2ak2  | -1.28                              |                                    |
| Nfkbia   | -1.28                              |                                    |
| Tbk1     | -1.29                              |                                    |
| Tnfaip3  | -1.30                              |                                    |
| Atf1     | -1.31                              |                                    |
| Mapk3    | -1.34                              |                                    |
| Cflar    | -1.37                              |                                    |
| Tradd    | -1.39                              |                                    |
| Egr1     | -1.41                              |                                    |
| Jun      | -1.42                              |                                    |
| Nfkb2    | -1.43                              |                                    |
| Tlr6     | -1.44                              |                                    |
| C3       | -1.44                              |                                    |
| Actb     | -1.44                              |                                    |
| Cd27     | -1.45                              |                                    |
| Tlr9     | -1.49                              |                                    |
| Irak2    | -1.50                              |                                    |
| Ccl2     | -1.52                              |                                    |
| Gusb     | -1.53                              |                                    |

| Target    | HPV16 <sup>tg/+</sup> vs. Wildtype | Not induced by HPV16 <sup>tg</sup> |
|-----------|------------------------------------|------------------------------------|
| Chuk      | -1.56                              |                                    |
| Tlr2      | -1.56                              |                                    |
| Htr2b     | -1.57                              |                                    |
| Raf1      | -1.60                              |                                    |
| Relb      | -1.66                              |                                    |
| Ikbkb     | -1.70                              |                                    |
| Traf2     | -1.71                              |                                    |
| Tlr3      | -1.72                              |                                    |
| Ikbke     | -1.75                              |                                    |
| Tollip    | -1.84                              |                                    |
| Irak1     | -1.93                              |                                    |
| Ikbkg     | -1.94                              |                                    |
| Crebbp    | -1.95                              |                                    |
| Tgfbr2    | -2.05                              |                                    |
| Ripk2     | -2.06                              |                                    |
| Ripk1     | -2.07                              |                                    |
| Tgfbr1    | -2.08                              |                                    |
| Tlr8      | -2.14                              |                                    |
| Card10    | -2.21                              |                                    |
| Kat2b     | -2.29                              |                                    |
| Tnfrsf10b | -2.30                              |                                    |
| Casp8     | -2.35                              |                                    |
| F2r       | -2.45                              |                                    |
| Lta       | -2.48                              |                                    |
| Il1r1     | -2.56                              |                                    |
| Elk1      | -2.60                              |                                    |
| Atf2      | -2.64                              |                                    |
| Tlr7      | -2.75                              |                                    |
| Map3k1    | -2.75                              |                                    |
| Tlr4      | -2.79                              |                                    |
| Fos       | -2.87                              |                                    |
| Smad3     | -4.34                              |                                    |
| Lpar1     | -5.65                              |                                    |

R.P. Hobbs et al.

Keratin 17 regulates Aire to promote skin tumorigenesis

Supplementary Table 3. Summary of "T<sub>h</sub>17 for Autoimmunity and Inflammation" Array

| Target  | HPV16 <sup>tg/+</sup> vs. Wildtype | HPV16 <sup>tg/+</sup> ;Krt17 <sup>-/-</sup> vs. HPV16 <sup>tg</sup> | HPV16 <sup>tg</sup> -induced, Krt17-dependent |
|---------|------------------------------------|---------------------------------------------------------------------|-----------------------------------------------|
| Il12rb2 | 2.06                               | -2.20                                                               |                                               |
| Socs3   | 1.72                               | -2.16                                                               |                                               |
| Ccl22   | 2.01                               | -1.94                                                               |                                               |
| Il3     | 5.45                               | -1.86                                                               |                                               |
| Il4     | 6.65                               | -1.81                                                               |                                               |
| Mmp13   | 4.18                               | -1.78                                                               |                                               |
| Cxcl5   | 11.28                              | -1.66                                                               |                                               |
| Cxcl2   | 21.55                              | -1.65                                                               |                                               |

| Target | HPV16 <sup>tg/+</sup> vs. Wildtype | HPV16 <sup>tg/+</sup> ;Krt17 <sup>-/-</sup> vs. HPV16 <sup>tg</sup> | HPV16 <sup>tg</sup> -induced, Krt17-independent |
|--------|------------------------------------|---------------------------------------------------------------------|-------------------------------------------------|
| Il23a  | 15.16                              | 2.05                                                                |                                                 |
| Csf2   | 15.10                              | 1.06                                                                |                                                 |
| Il1b   | 14.45                              | -1.30                                                               |                                                 |
| Il22   | 11.36                              | -1.37                                                               |                                                 |
| Ccl20  | 9.69                               | 1.00                                                                |                                                 |
| Il6    | 9.49                               | -1.12                                                               |                                                 |
| Il12b  | 7.09                               | -1.29                                                               |                                                 |
| Il17a  | 6.30                               | -1.29                                                               |                                                 |
| Clec7a | 4.47                               | 1.14                                                                |                                                 |
| Ifng   | 4.39                               | -1.47                                                               |                                                 |
| Icos   | 3.89                               | -1.06                                                               |                                                 |
| Il10   | 3.39                               | -1.17                                                               |                                                 |
| Cxcl1  | 2.83                               | -1.19                                                               |                                                 |
| Csf3   | 2.76                               | -1.45                                                               |                                                 |
| Cd8a   | 1.96                               | -1.07                                                               |                                                 |
| Il17f  | 1.91                               | 1.27                                                                |                                                 |
| Foxp3  | 1.91                               | -1.14                                                               |                                                 |
| Cd40lg | 1.82                               | 1.05                                                                |                                                 |
| Gapdh  | 1.75                               | -1.10                                                               |                                                 |
| Il21   | 1.71                               | 1.06                                                                |                                                 |
| Ccl1   | 1.54                               | 1.02                                                                |                                                 |

| Target   | HPV16 <sup>tg/+</sup> vs. Wildtype | Not induced by HPV16 <sup>tg</sup> |
|----------|------------------------------------|------------------------------------|
| Hprt1    | 1.37                               |                                    |
| Socs1    | 1.26                               |                                    |
| Cebpb    | 1.25                               |                                    |
| Il18     | 1.21                               |                                    |
| Cacybp   | 1.16                               |                                    |
| Cd4      | 1.13                               |                                    |
| Myd88    | 1.11                               |                                    |
| Syk      | 1.08                               |                                    |
| Traf6    | 1.07                               |                                    |
| Ccl7     | 1.02                               |                                    |
| Nfkb1    | 1.01                               |                                    |
| Stat3    | 1.01                               |                                    |
| Hsp90ab1 | -1.05                              |                                    |
| Il17rc   | -1.05                              |                                    |
| Tnf      | -1.13                              |                                    |
| Il13     | -1.15                              |                                    |
| Il17c    | -1.16                              |                                    |
| Il23r    | -1.16                              |                                    |
| Cd2      | -1.24                              |                                    |
| Icam1    | -1.28                              |                                    |
| Il7r     | -1.29                              |                                    |
| Yy1      | -1.37                              |                                    |
| Il12rb1  | -1.38                              |                                    |
| Stat5a   | -1.38                              |                                    |
| Actb     | -1.42                              |                                    |
| Stat6    | -1.50                              |                                    |
| Tirap    | -1.56                              |                                    |
| Ccl2     | -1.57                              |                                    |
| Jak1     | -1.60                              |                                    |
| Gusb     | -1.61                              |                                    |
| Il17re   | -1.63                              |                                    |
| Jak2     | -1.79                              |                                    |
| Stat4    | -1.79                              |                                    |
| Il27     | -1.83                              |                                    |
| Tgfb1    | -2.00                              |                                    |

| Target | HPV16 <sup>tg/+</sup> vs. Wildtype | Not induced by HPV16 <sup>tg</sup> |
|--------|------------------------------------|------------------------------------|
| Isg20  | -2.18                              |                                    |
| Cd247  | -2.19                              |                                    |
| Cx3cl1 | -2.19                              |                                    |
| Gata3  | -2.56                              |                                    |
| Il5    | -2.59                              |                                    |
| Mmp3   | -2.73                              |                                    |
| Cxcl12 | -2.92                              |                                    |
| Mmp9   | -2.92                              |                                    |
| Tlr4   | -2.98                              |                                    |
| Cd28   | -2.98                              |                                    |
| Il17rb | -3.22                              |                                    |
| S1pr1  | -3.30                              |                                    |
| Cd3d   | -3.36                              |                                    |
| Nfatc2 | -3.44                              |                                    |
| Tbx21  | -3.80                              |                                    |
| Il15   | -3.84                              |                                    |
| Il6ra  | -4.01                              |                                    |
| Il17d  | -4.10                              |                                    |
| Il17rd | -4.26                              |                                    |
| Cd34   | -4.35                              |                                    |
| Rorc   | -5.24                              |                                    |
| Cd3e   | -5.77                              |                                    |
| Cd3g   | -5.87                              |                                    |
| Il25   | -6.27                              |                                    |
| Il2    | -6.89                              |                                    |

R.P. Hobbs et al.

Keratin 17 regulates Aire to promote skin tumorigenesis

Supplementary Table 4. Summary of "Signal Transduction PathwayFinder" array

| Target | HPV16 <sup>tg/+</sup> vs. Wildtype | HPV16 <sup>tg/+</sup> ;Krt17 <sup>-/-</sup> vs. HPV16 <sup>tg</sup> | HPV16 <sup>tg</sup> -induced, Krt17-dependent |
|--------|------------------------------------|---------------------------------------------------------------------|-----------------------------------------------|
| Cdkn2a | 30.60                              | -1.98                                                               |                                               |
| Cxcl9  | 30.21                              | -1.88                                                               |                                               |
| Fos    | 3.47                               | -2.63                                                               |                                               |
| Ccl2   | 2.28                               | -2.29                                                               |                                               |
| Selp   | 2.24                               | -1.64                                                               |                                               |
| Fas    | 1.90                               | -9.39                                                               |                                               |
| Il4ra  | 1.85                               | -1.81                                                               |                                               |
| Tnf    | 1.84                               | -2.54                                                               |                                               |

| Target | HPV16 <sup>tg/+</sup> vs. Wildtype | HPV16 <sup>tg/+</sup> ;Krt17 <sup>-/-</sup> vs. HPV16 <sup>tg</sup> | HPV16 <sup>tg</sup> -induced, Krt17-independent |
|--------|------------------------------------|---------------------------------------------------------------------|-------------------------------------------------|
| Csf2   | 17.93                              | 1.26                                                                |                                                 |
| Fasl   | 11.71                              | 1.04                                                                |                                                 |
| Ccl20  | 8.59                               | 1.57                                                                |                                                 |
| Cxcl1  | 6.73                               | 1.64                                                                |                                                 |
| Il1a   | 6.70                               | -1.44                                                               |                                                 |
| Il2ra  | 4.66                               | 1.07                                                                |                                                 |
| Ptgs2  | 3.30                               | -1.11                                                               |                                                 |
| Birc5  | 2.59                               | 1.80                                                                |                                                 |
| Cd5    | 2.14                               | 1.07                                                                |                                                 |
| Cebpb  | 1.96                               | 1.17                                                                |                                                 |
| Egr1   | 1.94                               | 1.01                                                                |                                                 |
| Sele   | 1.80                               | -1.20                                                               |                                                 |
| Hk2    | 1.77                               | 1.37                                                                |                                                 |
| Tank   | 1.59                               | 1.29                                                                |                                                 |

| Target   | HPV16 <sup>tg/+</sup> vs. Wildtype | Not induced by HPV16 <sup>tg</sup> |
|----------|------------------------------------|------------------------------------|
| Rbp1     | 1.56                               |                                    |
| Brca1    | 1.48                               |                                    |
| Hprt1    | 1.47                               |                                    |
| Hsp90ab1 | 1.39                               |                                    |
| Cdk2     | 1.39                               |                                    |
| Birc3    | 1.35                               |                                    |
| Mmp10    | 1.34                               |                                    |
| Mmp7     | 1.33                               |                                    |
| Tfrc     | 1.20                               |                                    |
| Vcam1    | 1.18                               |                                    |
| Myc      | 1.14                               |                                    |
| Greb1    | 1.14                               |                                    |
| Igfbp4   | 1.11                               |                                    |
| Tcf7     | 1.10                               |                                    |
| Wisp1    | 1.10                               |                                    |
| Gapdh    | 1.10                               |                                    |
| Gadd45a  | 1.03                               |                                    |
| Nos2     | 1.02                               |                                    |
| En1      | -1.03                              |                                    |
| Atf2     | -1.08                              |                                    |
| Il2      | -1.14                              |                                    |
| Irf1     | -1.30                              |                                    |
| Trp53    | -1.33                              |                                    |
| Actb     | -1.33                              |                                    |
| Foxa2    | -1.35                              |                                    |
| Nfkbia   | -1.38                              |                                    |
| Cdkn2b   | -1.44                              |                                    |
| Odc1     | -1.45                              |                                    |
| Cdkn1a   | -1.47                              |                                    |
| Nrip1    | -1.55                              |                                    |
| Mdm2     | -1.64                              |                                    |
| Jun      | -1.68                              |                                    |
| Gusb     | -1.69                              |                                    |
| Cyp19a1  | -1.89                              |                                    |

| Target | HPV16 <sup>tg/+</sup> vs. Wildtype | Not induced by HPV16 <sup>tg</sup> |
|--------|------------------------------------|------------------------------------|
| Cdh1   | -1.91                              |                                    |
| Icam1  | -1.96                              |                                    |
| Vegfa  | -2.07                              |                                    |
| Pparg  | -2.14                              |                                    |
| Lta    | -2.19                              |                                    |
| Hhip   | -2.22                              |                                    |
| Wnt1   | -2.26                              |                                    |
| Fasn   | -2.33                              |                                    |
| Naip1  | -2.54                              |                                    |
| Birc2  | -2.64                              |                                    |
| Ikbkb  | -2.85                              |                                    |
| Bax    | -2.91                              |                                    |
| Nab2   | -2.92                              |                                    |
| Hsf1   | -3.01                              |                                    |
| Tert   | -3.25                              |                                    |
| Ei24   | -3.28                              |                                    |
| Cdkn1b | -3.38                              |                                    |
| Ccnd1  | -3.43                              |                                    |
| Lef1   | -3.52                              |                                    |
| Bmp4   | -3.54                              |                                    |
| Hoxa1  | -3.99                              |                                    |
| Wnt2   | -4.31                              |                                    |
| Ptch1  | -4.67                              |                                    |
| Hspb1  | -4.68                              |                                    |
| Pmepa1 | -5.07                              |                                    |
| Fn1    | -5.16                              |                                    |
| Bmp2   | -5.66                              |                                    |
| Fgf4   | -5.78                              |                                    |
| Igfbp3 | -5.93                              |                                    |
| Gys1   | -6.26                              |                                    |
| Bcl2l1 | -7.94                              |                                    |
| Bcl2   | -10.67                             |                                    |
| Lep    | -17.92                             |                                    |

R.P. Hobbs et al.

Keratin 17 regulates Aire to promote skin tumorigenesis

Supplementary Table 5. Summary of "Innate and Adaptive Immune Response" array

| Target  | HPV16 <sup>tg/+</sup> vs. Wildtype | HPV16 <sup>tg/+</sup> ;Krt17 <sup>-/-</sup> vs. HPV16 <sup>tg</sup> | HPV16 <sup>tg-</sup> induced, Krt17-dependent |
|---------|------------------------------------|---------------------------------------------------------------------|-----------------------------------------------|
| Ccr3    | 5.30                               | -3.26                                                               |                                               |
| Pglyrp3 | 4.62                               | -2.29                                                               |                                               |
| Prg2    | 9.94                               | -2.23                                                               |                                               |
| Tnf     | 2.11                               | -1.96                                                               |                                               |
| Hc      | 1.98                               | -1.75                                                               |                                               |

| Target   | HPV16 <sup>tg/+</sup> vs. Wildtype | HPV16 <sup>tg/+</sup> ;Krt17 <sup>-/-</sup> vs. HPV16 <sup>tg</sup> | HPV16 <sup>tg-</sup> induced, Krt17-independent |
|----------|------------------------------------|---------------------------------------------------------------------|-------------------------------------------------|
| Defb4    | 213.43                             | 2.85                                                                |                                                 |
| Trem1    | 90.63                              | 4.10                                                                |                                                 |
| Il1b     | 64.40                              | 2.08                                                                |                                                 |
| Il6      | 32.35                              | 1.13                                                                |                                                 |
| Il1f6    | 22.05                              | 2.74                                                                |                                                 |
| Clec7a   | 19.25                              | -1.37                                                               |                                                 |
| Il1f5    | 16.15                              | 2.45                                                                |                                                 |
| Ifnb1    | 9.70                               | -1.25                                                               |                                                 |
| Tlr1     | 8.85                               | 1.27                                                                |                                                 |
| Il10     | 8.68                               | -1.18                                                               |                                                 |
| Il1a     | 6.48                               | 2.42                                                                |                                                 |
| Cd14     | 4.56                               | 1.04                                                                |                                                 |
| Il1f9    | 4.32                               | 1.86                                                                |                                                 |
| Casp1    | 4.26                               | 3.04                                                                |                                                 |
| Casp4    | 4.23                               | 1.54                                                                |                                                 |
| Il1f8    | 3.96                               | 1.04                                                                |                                                 |
| Ccl2     | 3.60                               | -1.30                                                               |                                                 |
| Lyz1     | 3.41                               | 2.30                                                                |                                                 |
| Hprt     | 2.56                               | 3.96                                                                |                                                 |
| Il1rn    | 2.46                               | 2.31                                                                |                                                 |
| Ly96     | 2.13                               | 1.71                                                                |                                                 |
| Hsp90ab1 | 1.78                               | 2.06                                                                |                                                 |
| Chuk     | 1.63                               | 3.79                                                                |                                                 |
| Dmbt1    | 1.59                               | N/A                                                                 |                                                 |
| Proc     | 1.59                               | N/A                                                                 |                                                 |
| Sftpd    | 1.59                               | 2.28                                                                |                                                 |

| Target    | HPV16 <sup>tg/+</sup> vs. Wildtype | Not induced by HPV16 <sup>tg</sup> |
|-----------|------------------------------------|------------------------------------|
| C8a       | 1.47                               |                                    |
| Tlr3      | 1.40                               |                                    |
| Il12rb2   | 1.37                               |                                    |
| Pglyrp1   | 1.34                               |                                    |
| Irak1     | 1.24                               |                                    |
| Ltf       | 1.05                               |                                    |
| Ptafr     | 1.03                               |                                    |
| Nfkb1     | -1.00                              |                                    |
| Ppbp      | -1.01                              |                                    |
| Cxcr4     | -1.02                              |                                    |
| Ncf4      | -1.02                              |                                    |
| Serpina1a | -1.04                              |                                    |
| Tlr8      | -1.05                              |                                    |
| Irf1      | -1.07                              |                                    |
| Gusb      | -1.11                              |                                    |
| Il1r1     | -1.15                              |                                    |
| Cybb      | -1.16                              |                                    |
| Nfkbia    | -1.25                              |                                    |
| Cd55      | -1.36                              |                                    |
| Mif       | -1.39                              |                                    |
| Mapk14    | -1.48                              |                                    |
| Tlr4      | -1.52                              |                                    |
| Gapdh     | -1.57                              |                                    |
| Serpine1  | -1.57                              |                                    |
| Nlrc4     | -1.68                              |                                    |
| Il1r2     | -1.71                              |                                    |
| Tlr6      | -1.78                              |                                    |
| Nfkb2     | -1.93                              |                                    |
| Irak2     | -1.94                              |                                    |
| Tlr9      | -2.01                              |                                    |
| Lbp       | -2.11                              |                                    |
| Tollip    | -2.16                              |                                    |
| Il1rap    | -2.16                              |                                    |
| Tlr2      | -2.18                              |                                    |

| Target   | HPV16 <sup>tg/+</sup> vs. Wildtype | Not induced by HPV16 <sup>tg</sup> |
|----------|------------------------------------|------------------------------------|
| Mapk8    | -2.22                              |                                    |
| Cfp      | -2.25                              |                                    |
| Pglyrp2  | -2.26                              |                                    |
| Tgfb1    | -2.43                              |                                    |
| Actb     | -2.62                              |                                    |
| Nos2     | -2.70                              |                                    |
| Traf6    | -2.82                              |                                    |
| Crp      | -3.24                              |                                    |
| Adora2a  | -3.32                              |                                    |
| Hmox1    | -3.57                              |                                    |
| Lalba    | -3.62                              |                                    |
| Colec12  | -3.79                              |                                    |
| Ikbbk    | -3.83                              |                                    |
| Tnfrsf1a | -4.14                              |                                    |
| Ifngr1   | -4.43                              |                                    |
| Ifngr2   | -4.74                              |                                    |
| Camp     | -4.91                              |                                    |
| Cd1d1    | -5.21                              |                                    |
| Il1f10   | -5.26                              |                                    |
| Myd88    | -5.56                              |                                    |
| Stab1    | -6.03                              |                                    |
| Fn1      | -6.44                              |                                    |
| Il1rapl2 | N/A                                |                                    |
| Il1rl2   | N/A                                |                                    |

R.P. Hobbs et al.

**Keratin 17 regulates Aire to promote skin tumorigenesis**

**Supplementary Table 6. List of qRT-PCR target genes and primers sets**

| MOUSE           |         |                         | HUMAN           |         |                         |
|-----------------|---------|-------------------------|-----------------|---------|-------------------------|
| Target          | Primer  | Sequence (5'-->3')      | Target          | Primer  | Sequence (5'-->3')      |
| <i>Actb</i>     | Forward | GGCTGTATTCCCCTCCATCG    | <i>ACTB</i>     | Forward | CATGTACGTTGCTATCCAGGC   |
| <i>Actb</i>     | Reverse | CCAGTTGGTAAACAATGCCATGT | <i>ACTB</i>     | Reverse | CTCCTTAATGTACGCACGAT    |
| <i>Aire</i>     | Forward | AGGTCAGCTTCAGAGAAAACCA  | <i>AIRE</i>     | Forward | CCAGGCTCTCAACTGAAGGC    |
| <i>Aire</i>     | Reverse | TCATTCCCAGCACTCAGTAGA   | <i>AIRE</i>     | Reverse | GAATCCCGTCCCAGTGG       |
| <i>Anxa2</i>    | Forward | TGCTCTGAACATTGAGACAGC   | <i>ANXA2</i>    | Forward | GAGCGGGATGCTTTGAACATT   |
| <i>Anxa2</i>    | Reverse | AATAGGCCCAAATCACCGTC    | <i>ANXA2</i>    | Reverse | TAGGCGAAGGCAATATCCTGT   |
| <i>Axin2</i>    | Forward | ATGAGTAGCGCCGTGTTAGTG   | <i>AXIN2</i>    | Forward | CAACACCAGGCGGAACGAA     |
| <i>Axin2</i>    | Reverse | GGCATAGGTTTGGTGGACT     | <i>AXIN2</i>    | Reverse | GCCAATAAGGAGTGTAAAGGACT |
| <i>Ccl19</i>    | Forward | CCTGGGAACATCGTGAAAGC    | <i>CCL19</i>    | Forward | TACATCGTGAGGAACTTCCACT  |
| <i>Ccl19</i>    | Reverse | TAGTGTGGTGAACACAACAGC   | <i>CCL19</i>    | Reverse | CTGGATGATGCGTTCTACCCA   |
| <i>Ccl2</i>     | Forward | TTAAAACTGGATCGGAACCAA   | <i>CCL2</i>     | Forward | CAGCCAGATGCAATCAATGCC   |
| <i>Ccl2</i>     | Reverse | GCATTAGCTTCAGATTTACGGGT | <i>CCL2</i>     | Reverse | TGGAATCCTGAACCCACTTCT   |
| <i>Ccl22</i>    | Forward | AAGCCTGGCGTTGTTTTGATA   | <i>CCL22</i>    | Forward | ATCGCCTACAGACTGCCTC     |
| <i>Ccl22</i>    | Reverse | CCTGGGATCGGCACAGATA     | <i>CCL22</i>    | Reverse | GACGGTAACGGACGTAATCAC   |
| <i>Ccl25</i>    | Forward | GAGGGCGATGAGAATCTTGAC   | <i>CCL25</i>    | Forward | CACCACAACACGCAGACCTT    |
| <i>Ccl25</i>    | Reverse | TCCTCACGCTTGTACTGTTGG   | <i>CCL25</i>    | Reverse | TGCTGATGGGATTGCTAAACTT  |
| <i>Ccl5</i>     | Forward | GCTGCTTTGCCACCTCTCC     | <i>CCL5</i>     | Forward | TCCAACCCAGCAGTCGTCT     |
| <i>Ccl5</i>     | Reverse | TCGAGTGACAAACACGACTGC   | <i>CCL5</i>     | Reverse | TTGGCGGTTCTTTCGGGTG     |
| <i>Ccr4</i>     | Forward | TGCACCAAGGAAGGTATCAAGG  | <i>CCR4</i>     | Forward | AGAAGGCATCAAGGCATTGG    |
| <i>Ccr4</i>     | Reverse | GTACACGTCCGTCATGGACTT   | <i>CCR4</i>     | Reverse | ACACATCAGTCATGGACCTGAG  |
| <i>Ccr7</i>     | Forward | GTACGAGTCGGTGTGCTTCAA   | <i>CCR7</i>     | Forward | TGAGGTCACGGACGATTACAT   |
| <i>Ccr7</i>     | Reverse | GGTAGGTATCCGTCATGGTCT   | <i>CCR7</i>     | Reverse | GTAGGCCACGAAACAAATGAT   |
| <i>Cd40</i>     | Forward | TTGTTGACAGCGGTCCATCTA   | <i>CD40</i>     | Forward | CACCTGGAACAGAGAGACACA   |
| <i>Cd40</i>     | Reverse | CCATCGTGGAGGTAAGTGTG    | <i>CD40</i>     | Reverse | CCTCACTCGTACAGTGCCA     |
| <i>Cflar</i>    | Forward | GCTCCAGAATGGGCGAAGTAA   | <i>CFLAR</i>    | Forward | TGCTCTTTTGTGCCGGGAT     |
| <i>Cflar</i>    | Reverse | ACGGATGTGCGGAGGTAATAA   | <i>CFLAR</i>    | Reverse | CGACAGACAGCTTACCTCTTTC  |
| <i>Cxcl10</i>   | Forward | CCAAGTGCTGCCGTCATTTTC   | <i>CXCL10</i>   | Forward | GTGGCATTCAAGGAGTACCTC   |
| <i>Cxcl10</i>   | Reverse | GGCTCGCAGGGATGATTTCAA   | <i>CXCL10</i>   | Reverse | TGATGGCCTTCGATTCTGGATT  |
| <i>Cxcl11</i>   | Forward | GGCTTCCTTATGTTCAAACAGGG | <i>CXCL11</i>   | Forward | GACGCTGTCTTTCATAGGC     |
| <i>Cxcl11</i>   | Reverse | GCCGTTACTCGGGTAAATTACA  | <i>CXCL11</i>   | Reverse | GGATTTAGGCATCGTTGTCCTTT |
| <i>Cxcl5</i>    | Forward | TCCAGCTCGCCATTTCATGC    | <i>CXCL5</i>    | Forward | AGTGCCTTGCCTTGTGTTAC    |
| <i>Cxcl5</i>    | Reverse | TTGCGGCTATGACTGAGGAAG   | <i>CXCL5</i>    | Reverse | GCGAACACTTGCAAGTACTGA   |
| <i>Cxcl9</i>    | Forward | TCCTTTTGGGCATCATCTTCC   | <i>CXCL9</i>    | Forward | GTAGTGAGAAAGGGTGCCTGT   |
| <i>Cxcl9</i>    | Reverse | TTTGTAGTGGATCGTGCCTCG   | <i>CXCL9</i>    | Reverse | AGGGCTTGGGGCAAATTGTT    |
| <i>Cxcr3</i>    | Forward | TACCTTGAGGTTAGTGAACGTCA | <i>CXCR3</i>    | Forward | CCACCTAGCTGTAGCAGACAC   |
| <i>Cxcr3</i>    | Reverse | CGCTCTCGTTTTCCCATAATC   | <i>CXCR3</i>    | Reverse | AGGGCTCCTGCGTAGAAGTT    |
| <i>Deptor</i>   | Forward | GATAGACGGCACCATCTCAAAA  | <i>DEPTOR</i>   | Forward | CCTACCCAAACTGTTTTGTCGC  |
| <i>Deptor</i>   | Reverse | GGCCTCCTTATGTTCAATGAGC  | <i>DEPTOR</i>   | Reverse | CGGTCTGCTAATTTCTGCATGAG |
| <i>Egr1</i>     | Forward | TCGGCTCCTTCTCACTCA      | <i>EGR1</i>     | Forward | GGTCAGTGGCCTAGTGAGC     |
| <i>Egr1</i>     | Reverse | CTCATAGGGTTGTTGCTCGG    | <i>EGR1</i>     | Reverse | GTGCCGCTGAGTAAATGGGA    |
| <i>Eif4e</i>    | Forward | AACCGGAAACCACCCTAC      | <i>EIF4E</i>    | Forward | TGCGGCTGATCTCCAAGTTTG   |
| <i>Eif4e</i>    | Reverse | CTCTGGGTTAGCAACCTCT     | <i>EIF4E</i>    | Reverse | CCCACATAGGCTCAATACCATC  |
| <i>Eif4ebp1</i> | Forward | GGGGACTACAGCACCCTC      | <i>EIF4EBP1</i> | Forward | CTATGACCGGAAATTCCTGATGG |
| <i>Eif4ebp1</i> | Reverse | GTTCCGACACTCCATCAGAAAT  | <i>EIF4EBP1</i> | Reverse | CCCGCTTATCTTCTGGGCTA    |
| <i>Fn1</i>      | Forward | TTCAAGTGTGATCCCCATGAAG  | <i>FN1</i>      | Forward | AGGAAGCCGAGGTTTTAACTG   |
| <i>Fn1</i>      | Reverse | CAGGTCTACGGCAGTTGTCA    | <i>FN1</i>      | Reverse | AGGACGCTCATAAGTGTACC    |

|                  |         |                         |  |                  |         |                         |
|------------------|---------|-------------------------|--|------------------|---------|-------------------------|
| <i>Foxp3</i>     | Forward | ACCATTGGTTTACTCGCATGT   |  | <i>FOXP3</i>     | Forward | CTTCAAGTTCACAACATGCG    |
| <i>Foxp3</i>     | Reverse | TCCACTCGCACAAAGCACTT    |  | <i>FOXP3</i>     | Reverse | CGTGGCGTAGGTGAAAGGG     |
| <i>GAPDH</i>     | Forward | AAATGGTGAAGGTCGGTGT     |  | <i>GAPDH</i>     | Forward | AAGGTGAAGGTCGGAGTCAAC   |
| <i>GAPDH</i>     | Reverse | ACTCCACGACATACTCAGCAC   |  | <i>GAPDH</i>     | Reverse | GGGGTCATTGATGGCAACAATA  |
| <i>Hnrnpa2b1</i> | Forward | GTTGAGCCAAAACGTGCTGTA   |  | <i>HNRNPA2B1</i> | Forward | TGGAGGTAGCCCCGTTATG     |
| <i>Hnrnpa2b1</i> | Reverse | TTTCCAGACTGCCTATCGGTA   |  | <i>HNRNPA2B1</i> | Reverse | GGACCGTAGTTAGAAGGTTGCT  |
| <i>Hnrnpd</i>    | Forward | CCCCACGACACACTGAAGC     |  | <i>HNRNPD</i>    | Forward | GCGTGGGTTCTGCTTTATTACC  |
| <i>Hnrnpd</i>    | Reverse | CGCCCTGTGATAGGATCTAACT  |  | <i>HNRNPD</i>    | Reverse | TTGCTGATATTGTTCTTCGACA  |
| <i>Hnrnpk</i>    | Forward | ACTGATGAGATGGTTGAATTGCG |  | <i>HNRNPK</i>    | Forward | GCAGGAGGAATTATTGGGGTC   |
| <i>Hnrnpk</i>    | Reverse | CTGGCATTGTAGTCTGTACGG   |  | <i>HNRNPK</i>    | Reverse | TGCACTCTACAACCTATCGG    |
| <i>Hspa1a/1b</i> | Forward | TGGTGCAGTCCGACATGAAG    |  | <i>HSPA1A/1B</i> | Forward | TTTGAGGGCATCGACTTCTACA  |
| <i>Hspa1a/1b</i> | Reverse | GCTGAGAGTCGTTGAAGTAGGC  |  | <i>HSPA1A/1B</i> | Reverse | CCAGGACCAGGTCGTGAATC    |
| <i>Hspa5</i>     | Forward | ACTTGGGGACCACCTATTCTT   |  | <i>HSPA5</i>     | Forward | CATCACGCCGTCTATGTGCG    |
| <i>Hspa5</i>     | Reverse | ATCGCCAATCAGACGCTCC     |  | <i>HSPA5</i>     | Reverse | CGTCAAAGACCCTGTTCTCG    |
| <i>Hspa8</i>     | Forward | TCTCGGCACCACCTACTCC     |  | <i>HSPA8</i>     | Forward | ATGCCAAACGTCTGATTGGAC   |
| <i>Hspa8</i>     | Reverse | CTACGCCCGATCAGACGTTT    |  | <i>HSPA8</i>     | Reverse | AGCATCATTACCACCATAAAGG  |
| <i>Hspa9</i>     | Forward | ATGGCTGGAATGGCCTTAGC    |  | <i>HSPA9</i>     | Forward | CTTGTTC AAGGCGGGATTATGC |
| <i>Hspa9</i>     | Reverse | ACCCAAATCAATACCAACCACTG |  | <i>HSPA9</i>     | Reverse | GCAGGAGTTGGTAGTACCCAAA  |
| <i>Icam1</i>     | Forward | GTGATGCTCAGGTATCCATCCA  |  | <i>ICAM1</i>     | Forward | ATGCCCAGACATCTGTGTCC    |
| <i>Icam1</i>     | Reverse | CACAGTTCTCAAAGCACAGCG   |  | <i>ICAM1</i>     | Reverse | GGGGTCTCTATGCCCAACAA    |
| <i>Ido1</i>      | Forward | GCTTTGCTCTACCACATCCAC   |  | <i>IDO1</i>      | Forward | TTGCACGTCTAGTTCTGGGAT   |
| <i>Ido1</i>      | Reverse | CAGGCGCTGTAACCTGTGT     |  | <i>IDO1</i>      | Reverse | GCAAGACCTTACGGACATCTCC  |
| <i>Ido2</i>      | Forward | AAGGCCAACCCCAAAGGTG     |  | <i>IDO2</i>      | Forward | CCACAGACCGAATGTGAAGAC   |
| <i>Ido2</i>      | Reverse | ACCAGGATAGGCGGGAGTC     |  | <i>IDO2</i>      | Reverse | TGTTGGCAATTTCCATCCAAGG  |
| <i>Ifng</i>      | Forward | ATGAACGCTACACACTGCATC   |  | <i>IFNG</i>      | Forward | TCGGTAACTGACTTGAATGTCCA |
| <i>Ifng</i>      | Reverse | CCATCCTTTTGCCAGTTCTCTC  |  | <i>IFNG</i>      | Reverse | TCGCTTCCCTGTTT TAGCTGC  |
| <i>Ikbkb</i>     | Forward | GACATCGCATCGGCTCTTAGA   |  | <i>IKBKB</i>     | Forward | GTCTTTGCATCATTCTGTTGGG  |
| <i>Ikbkb</i>     | Reverse | AACGGTCACGGTGTACTTCTG   |  | <i>IKBKB</i>     | Reverse | GTGCCGAAGCTCCAGTAGTC    |
| <i>Il17a</i>     | Forward | TTTAACTCCCTTGCGCAAAA    |  | <i>IL17A</i>     | Forward | TCCCACGAAATCCAGGATGC    |
| <i>Il17a</i>     | Reverse | CTTCCCTCCGATTGACAC      |  | <i>IL17A</i>     | Reverse | TGTTCAAGTTGACCATCACAGT  |
| <i>Il17c</i>     | Forward | CTCCTGTTCTAGGCTGGTTG    |  | <i>IL17C</i>     | Forward | CCACACTGCTACTCGGCTG     |
| <i>Il17c</i>     | Reverse | CCACCTGGCACTTCGAGTTAG   |  | <i>IL17C</i>     | Reverse | CACACGGTATCTCCAGGGTGA   |
| <i>Il20</i>      | Forward | TCTTGCCCTTTGGACTGTTCTCC |  | <i>IL20</i>      | Forward | TTTTCTGAGATACGGGGCAGT   |
| <i>Il20</i>      | Reverse | GTTTGCAGTAATCACACAGCTTC |  | <i>IL20</i>      | Reverse | GTCTTAGCAAATGGCGCAGGA   |
| <i>Il4</i>       | Forward | GGTCTCAACCCCAAGCTAGT    |  | <i>IL4</i>       | Forward | CGGCAACTTTGTCCACGGA     |
| <i>Il4</i>       | Reverse | GCCGATGATCTCTCAAGTGAT   |  | <i>IL4</i>       | Reverse | TCTGTTACGGTCAACTCGGTG   |
| <i>Il6</i>       | Forward | CCAAGAGGTGAGTGCTTCCC    |  | <i>IL6</i>       | Forward | AATTCGGTACATCCTCGACGG   |
| <i>Il6</i>       | Reverse | CTGTTGTTCAAGTCTCTCCCT   |  | <i>IL6</i>       | Reverse | TTGGAAGGTTCAAGTTGTTTCT  |
| <i>Irf1</i>      | Forward | ATGCCAATCACTCGAATGCG    |  | <i>IRF1</i>      | Forward | TTCACACAGGCCGATACAAAG   |
| <i>Irf1</i>      | Reverse | TTGTATCGGCCTGTGTGAATG   |  | <i>IRF1</i>      | Reverse | CATGGCACAGCGAAAGTTGG    |
| <i>Krt14</i>     | Forward | AGCGGCAAGAGTGAGATTCT    |  | <i>KRT14</i>     | Forward | TGAGCCGATTCTGAACGAG     |
| <i>Krt14</i>     | Reverse | CCTCCAGGTTATTCTCCAGGG   |  | <i>KRT14</i>     | Reverse | GATGACTGCGATCCAGAGGA    |
| <i>Krt16</i>     | Forward | GGTGGCCTCTAACAGTGATCT   |  | <i>KRT16</i>     | Forward | GACCGGCGGAGATGTGAAC     |
| <i>Krt16</i>     | Reverse | TGCATACAGTATCTGCCTTTGG  |  | <i>KRT16</i>     | Reverse | CTGCTCGTACTGGTCACGC     |
| <i>Krt17</i>     | Forward | ACCATCCGCCAGTTTACCTC    |  | <i>KRT17</i>     | Forward | GGTGGGTGGTGAATCAATGT    |
| <i>Krt17</i>     | Reverse | CTACCCAGGCCACTAGCTGA    |  | <i>KRT17</i>     | Reverse | CGCGGTTCAAGTTCTCTGTC    |
| <i>Mapkap1</i>   | Forward | GAGACGCAGGGCTACATATACG  |  | <i>MAPKAP1</i>   | Forward | GGTGGACACCGATTTCCTCC    |
| <i>Mapkap1</i>   | Reverse | GCGGAGTCGTTCTAATCTTTGA  |  | <i>MAPKAP1</i>   | Reverse | CGCTTACTGCCTTCAGTAAGA   |
| <i>Mlst8</i>     | Forward | ATCAGTGGGCTTTCACGAGG    |  | <i>MLST8</i>     | Forward | TGTGGGCTTCCACGAAGAC     |
| <i>Mlst8</i>     | Reverse | GGTGCCTTACCTGGAAGAT     |  | <i>MLST8</i>     | Reverse | AGTTAATGGGTGCGTTCACCT   |
| <i>Mmp2</i>      | Forward | ACCTGAACACTTTCTATGGCTG  |  | <i>MMP2</i>      | Forward | GATACCCCTTTGACGGTAAGGA  |
| <i>Mmp2</i>      | Reverse | CTTCCGCATGGTCTCGATG     |  | <i>MMP2</i>      | Reverse | CCTTCTCCAAGGTCCATAGC    |

|                |         |                         |                |         |                         |
|----------------|---------|-------------------------|----------------|---------|-------------------------|
| <i>Mmp3</i>    | Forward | ACATGGAGACTTTGTCCCTTTTG | <i>MMP3</i>    | Forward | CTGGACTCCGACACTCTGGA    |
| <i>Mmp3</i>    | Reverse | TTGGCTGAGTGGTAGAGTCCC   | <i>MMP3</i>    | Reverse | CAGGAAAGGTTCTGAAGTGACC  |
| <i>Mmp9</i>    | Forward | CTGGACAGCCAGACACTAAAG   | <i>MMP9</i>    | Forward | TGTACCGCTATGGTTACACTCG  |
| <i>Mmp9</i>    | Reverse | CTCGCGGCAAGTCTTCAGAG    | <i>MMP9</i>    | Reverse | GGCAGGGACAGTTGCTTCT     |
| <i>Mpz</i>     | Forward | CGGACAGGGAAATCTATGGTGC  | <i>MPZ</i>     | Forward | CATCGTGGTTTACACCGACAG   |
| <i>Mpz</i>     | Reverse | GCGCCAGGTAAAAGAGATGTCA  | <i>MPZ</i>     | Reverse | TGGAAGATCGAAATGCCATCTCT |
| <i>Mpz1</i>    | Forward | TGGATGGTTGACCACGGTCT    | <i>MPZL1</i>   | Forward | ACGCCAAAAGAAATCTTCGTGG  |
| <i>Mpz1</i>    | Reverse | CCCAGGTGACTCGGTCTTT     | <i>MPZL1</i>   | Reverse | TCAACCCGCCAGTCGACTA     |
| <i>Mpz2</i>    | Forward | GATGCGCTAACTGTGACGTG    | <i>MPZL2</i>   | Forward | TTAATGGGACAGATGCTCGGT   |
| <i>Mpz2</i>    | Reverse | GGTCTTTGAACCGTCCGCT     | <i>MPZL2</i>   | Reverse | AAGACACCCGGTCTTAAACC    |
| <i>Mpz3</i>    | Forward | CCTTGGAGATAAGTGCCGATG   | <i>MPZL3</i>   | Forward | ATGCCCATGTCCGAGGTTATG   |
| <i>Mpz3</i>    | Reverse | CGGTATGTCCAGTCTATGGTCA  | <i>MPZL3</i>   | Reverse | GGAGGGCGATATGTCCAGTCT   |
| <i>Mtor</i>    | Forward | CAGTTCGCCAGTGGACTGAAG   | <i>MTOR</i>    | Forward | ACTCGTCTATGACCAACTGA    |
| <i>Mtor</i>    | Reverse | GCTGGTCATAGAAGCGAGTAGAC | <i>MTOR</i>    | Reverse | CACCTTCCACTCTATGAGGC    |
| <i>Myd88</i>   | Forward | TCATGTTCTCCATACCCTTGGT  | <i>MYD88</i>   | Forward | GGCTGCTCTCAACATGCGA     |
| <i>Myd88</i>   | Reverse | AAACTGCGAGTGGGGTCAG     | <i>MYD88</i>   | Reverse | CTGTGTCCGCACGTTCAAGA    |
| <i>Nfkb1a</i>  | Forward | TGAAGGACGAGGAGTACGAGC   | <i>NFKBIA</i>  | Forward | CTCCGAGACTTTCGAGGAAATAC |
| <i>Nfkb1a</i>  | Reverse | TTCGTGGATGATTGCCAAGTG   | <i>NFKBIA</i>  | Reverse | GCCATTGTAGTTGGTAGCCTTCA |
| <i>Prkca</i>   | Forward | GTTTACCCGGCCAACGACT     | <i>PRKCA</i>   | Forward | AAGGGACCCGACACTGATGA    |
| <i>Prkca</i>   | Reverse | GGGCGATGAATTTGTGGTCTT   | <i>PRKCA</i>   | Reverse | AAGGTGGGGCTTCCGTAAGT    |
| <i>Ptgs2</i>   | Forward | TGCACTATGGTTACAAAAGCTGG | <i>PTGS2</i>   | Forward | CCAGTATAAGTGCATTGTACCC  |
| <i>Ptgs2</i>   | Reverse | TCAGGAAGCTCCTTATTTCCCTT | <i>PTGS2</i>   | Reverse | TCAAAAATCCGGTGTGAGCA    |
| <i>Rela</i>    | Forward | AGGCTTCTGGGCCTTATGTG    | <i>RELA</i>    | Forward | GTGGGGACTACGACCTGAATG   |
| <i>Rela</i>    | Reverse | TGCTTCTCTCGCCAGGAATAC   | <i>RELA</i>    | Reverse | GGGGCACGATTGTCAAAGATG   |
| <i>Rictor</i>  | Forward | GCTGCGCTATCTCATCCAAGA   | <i>RICTOR</i>  | Forward | TCCAAAGACTCGACAGTATGTGC |
| <i>Rictor</i>  | Reverse | CTTTCTGACTAAGCGAAGGGC   | <i>RICTOR</i>  | Reverse | GGCTAGAAATCGTGCTTCTCTG  |
| <i>Rn18s</i>   | Forward | CCTGTGCCTTCCTTGGGA      | <i>RPS18</i>   | Forward | GCGGCGGAAAATAGCCTTTG    |
| <i>Rn18s</i>   | Reverse | CATTCGAACGTCTGCCCTATC   | <i>RPS18</i>   | Reverse | GATCACACGTTCCACCTCATC   |
| <i>Rps6kb1</i> | Forward | GGGGCTATGGAAAGTTTTTCA   | <i>RPS6KB1</i> | Forward | AGAACTTCTGGCTCGAAAGGT   |
| <i>Rps6kb1</i> | Reverse | CGTGTCTTAGCATTCTCACT    | <i>RPS6KB1</i> | Reverse | CGACAGGTGTCTGACGTGTA    |
| <i>Rptor</i>   | Forward | TGTGAGAAAATCGAAGGCTCC   | <i>RPTOR</i>   | Forward | AATGCTGCAATCGCCTCTTCT   |
| <i>Rptor</i>   | Reverse | TTTGACCGATGGTTCCAGA     | <i>RPTOR</i>   | Reverse | GCCAAAGGTAGGTTCCAGTCTG  |
| <i>Runx1</i>   | Forward | GCAGGCAACGATGAAACTACT   | <i>RUNX1</i>   | Forward | CTGCCATCGCTTTCAAGGT     |
| <i>Runx1</i>   | Reverse | GCAACTTGTGGCGGATTTGTA   | <i>RUNX1</i>   | Reverse | GCCGAGTAGTTTTATCATTGCC  |
| <i>S100a10</i> | Forward | TGGAAACCATGATGCTTACGTT  | <i>S100A10</i> | Forward | GGCTACTTAACAAAGGAGGACC  |
| <i>S100a10</i> | Reverse | GAAGCCCACTTTGCCATCTC    | <i>S100A10</i> | Reverse | GAGGCCCGCAATTAGGGAAA    |
| <i>S100a4</i>  | Forward | TGAGCAACTTGGACAGCAACA   | <i>S100A4</i>  | Forward | GATGAGCAACTTGGACAGCAA   |
| <i>S100a4</i>  | Reverse | TTCCGGGGTTCCTTATCTGGG   | <i>S100A4</i>  | Reverse | CTGGGCTGCTTATCTGGGAAG   |
| <i>S100a5</i>  | Forward | ATTCAGGGAGAGAGGGTAGCA   | <i>S100A5</i>  | Forward | GGAGAGAGGGTAGCAAAGTGA   |
| <i>S100a5</i>  | Reverse | CTCTGCAAGACTCAGCTCTGT   | <i>S100A5</i>  | Reverse | TCCCAAGACACAGCTCTTTC    |
| <i>S100a7a</i> | Forward | AGGAGTTGAAAGCTCTGCTCT   | <i>S100A7</i>  | Forward | ACGTGATGACAAGATTGACAAGC |
| <i>S100a7a</i> | Reverse | GCTCTGTGATGTAGTATGGCTG  | <i>S100A7</i>  | Reverse | GCGAGGTAATTTGTGCCCTTT   |
| <i>S100a8</i>  | Forward | AAATCACCATGCCCTCTACAAG  | <i>S100A8</i>  | Forward | ATGCCGTCTACAGGGATGAC    |
| <i>S100a8</i>  | Reverse | CCCACCTTTATCACCATCGCAA  | <i>S100A8</i>  | Reverse | ACACTCGGTCTCTAGCAATTTCT |
| <i>S100a9</i>  | Forward | ATACTCTAGGAAGGAAGGACACC | <i>S100A9</i>  | Forward | GGTCATAGAACACATCATGGAGG |
| <i>S100a9</i>  | Reverse | TCCATGATGTCATTTATGAGGGC | <i>S100A9</i>  | Reverse | GGCTGGCTTATGGTGGTG      |
| <i>Sdc1</i>    | Forward | CTTTGTACGGCAGACACCTT    | <i>SDC1</i>    | Forward | CTGCCGCAATTTGTGGCTAC    |
| <i>Sdc1</i>    | Reverse | GACAGAGGTAAAAGCAGTCTCG  | <i>SDC1</i>    | Reverse | TGAGCCGGAGAAGTTGTGAGA   |
| <i>Sfn</i>     | Forward | GTGTGTGCGACACCGTACT     | <i>SFN</i>     | Forward | TGACGACAAGAAGCGCATCAT   |
| <i>Sfn</i>     | Reverse | CTCGGCTAGGTAGCGGTAG     | <i>SFN</i>     | Reverse | GTAGTGAAGACGGAAAAGTTCA  |
| <i>Socs1</i>   | Forward | CTGCGGCTTCTATTGGGGAC    | <i>SOCS1</i>   | Forward | TTTTCGCCCTTAGCGTGAAGA   |
| <i>Socs1</i>   | Reverse | AAAAGGCAGTCGAAGGTCTCG   | <i>SOCS1</i>   | Reverse | GAGGCAGTCGAAGCTCTCG     |



|                  |         |                         |  |                  |         |                          |
|------------------|---------|-------------------------|--|------------------|---------|--------------------------|
| <i>Stat1</i>     | Forward | GCTGCCTATGATGTCTCGTTT   |  | <i>STAT1</i>     | Forward | GCAGGTTACCAGCTTTATGA     |
| <i>Stat1</i>     | Reverse | TGCTTTTCCGTATGTTGTGCT   |  | <i>STAT1</i>     | Reverse | TGAAGATTACGCTTGCTTTTCTT  |
| <i>Stat2</i>     | Forward | TTTGGCTACCTGGATTGAAGAC  |  | <i>STAT2</i>     | Forward | CCAGCTTTACTCGCACAGC      |
| <i>Stat2</i>     | Reverse | GGCTGAATTTTCGCAAGTTATGC |  | <i>STAT2</i>     | Reverse | AGCCTTGAATCATCACTCCC     |
| <i>Stat3</i>     | Forward | CACCTTGGATTGAGAGTCAAGAC |  | <i>STAT3</i>     | Forward | CAGCAGCTTGACACACGGTA     |
| <i>Stat3</i>     | Reverse | AGGAATCGGCTATATTGCTGGT  |  | <i>STAT3</i>     | Reverse | AAACACCAAAGTGGCATGTGA    |
| <i>Stat4</i>     | Forward | GCACTCAGTAAGATGACGCAG   |  | <i>STAT4</i>     | Forward | TGTTGGCCCAATGGATTGAAA    |
| <i>Stat4</i>     | Reverse | CCAGTAGGGTAAAGCAGTTCTG  |  | <i>STAT4</i>     | Reverse | GGAAACACGACCTAACTGTTTCAT |
| <i>Stat5a</i>    | Forward | CAGCCGTGGGATGCTATTGA    |  | <i>STAT5A</i>    | Forward | GCAGAGTCCGTGACAGAGG      |
| <i>Stat5a</i>    | Reverse | GGGACACGGGCATACGTG      |  | <i>STAT5A</i>    | Reverse | CCACAGGTAGGGACAGAGTCT    |
| <i>Stat5b</i>    | Forward | TGTCCCTGAAACGAATCAAGAG  |  | <i>STAT5B</i>    | Forward | GAACACCCGCAATGATTACAGT   |
| <i>Stat5b</i>    | Reverse | CTGAAGTGTGAGTCAAACAGGAT |  | <i>STAT5B</i>    | Reverse | ACGGTCTGACCTTTAATTCGT    |
| <i>Stat6</i>     | Forward | TGGAGAGCATCTATCAGAGGGA  |  | <i>STAT6</i>     | Forward | GTTCCGCCACTTGCCAATG      |
| <i>Stat6</i>     | Reverse | GCGGAACTCTTCTATAACAGCTT |  | <i>STAT6</i>     | Reverse | TGGATCTCCCTACTCGGTG      |
| <i>Tcf4</i>      | Forward | GATGGGACTCCCTATGACCAC   |  | <i>TCF4</i>      | Forward | AAAAATGGACCAACTTCTTTGGC  |
| <i>Tcf4</i>      | Reverse | GAAAGGGTTCCTGGATTGCC    |  | <i>TCF4</i>      | Reverse | GGAATTGACAAAAGGTGGAGAGA  |
| <i>Thbs1</i>     | Forward | CCTGCCAGGGAAGCAACAA     |  | <i>THBS1</i>     | Forward | AGACTCCGCATCGCAAAGG      |
| <i>Thbs1</i>     | Reverse | ACAGTCTATGTAGAGTTGAGCCC |  | <i>THBS1</i>     | Reverse | TCACCACGTTGTTGTCAAGGG    |
| <i>Thbs2</i>     | Forward | GGGGACACTTTGGACCTCAAC   |  | <i>THBS2</i>     | Forward | GACACGCTGGATCTCACCTAC    |
| <i>Thbs2</i>     | Reverse | GCAGCCACATACAGGCTA      |  | <i>THBS2</i>     | Reverse | GAAGCTGTCTATGAGGTCGCA    |
| <i>Tnfrsf11a</i> | Forward | CAGATGTCTTTTCGTCCACAGA  |  | <i>TNFRSF11A</i> | Forward | TCCTCCACGGACAAATGCAG     |
| <i>Tnfrsf11a</i> | Reverse | AGACTGGGCAGGTAAGCCT     |  | <i>TNFRSF11A</i> | Reverse | CAAACCGCATCGGATTTCTCT    |
| <i>Tnfsf10</i>   | Forward | ATGGTGATTGCATAGTGCTCC   |  | <i>TNFSF10</i>   | Forward | TGCGTGCTGATCGTGATCTTC    |
| <i>Tnfsf10</i>   | Reverse | GCAAGCAGGGTCTGTCAAGA    |  | <i>TNFSF10</i>   | Reverse | GCTCGTTGGTAAAGTACACGTA   |
| <i>Traf2</i>     | Forward | AGAGAGTAGTTCGGCCTTTC    |  | <i>TRAF2</i>     | Forward | TCCCTGGAGTTGCTACAGC      |
| <i>Traf2</i>     | Reverse | GTGCATCCATCATTGGGACAG   |  | <i>TRAF2</i>     | Reverse | AGGCGGAGCACAGGTA         |
| <i>Trim28</i>    | Forward | CCCTGTCTACATTCGGCCTG    |  | <i>TRIM28</i>    | Forward | TTTCATGCGTGATAGTGGCAG    |
| <i>Trim28</i>    | Reverse | ACGATGTCTTTGGAGTAGCACT  |  | <i>TRIM28</i>    | Reverse | GCCTCTACAGGTCTCACAC      |
| <i>Wnt1</i>      | Forward | CGACTGATCCGACAGAACCC    |  | <i>WNT1</i>      | Forward | GGTGGGGTATTGTGAACGTAG    |
| <i>Wnt1</i>      | Reverse | CCATTTGCACTCTCGACA      |  | <i>WNT1</i>      | Reverse | CGTATCAGACGCCGCTGTTT     |
| <i>Wnt10a</i>    | Forward | CATGCTCGAATGAGACTCCAC   |  | <i>WNT10A</i>    | Forward | AAGCCTGGAGACTCGCAAC      |
| <i>Wnt10a</i>    | Reverse | CCCTACTGTGCGGAACTCAG    |  | <i>WNT10A</i>    | Reverse | CGATGGCGTAGGCCAAAAGC     |
| <i>Wnt10b</i>    | Forward | ATCGCCGTTACGAGTGTC      |  | <i>WNT10B</i>    | Forward | GTGAGCGAGACCCCACTATG     |
| <i>Wnt10b</i>    | Reverse | GGAAACCGCGCTTGAGGAT     |  | <i>WNT10B</i>    | Reverse | CACTCTGTAACCTTGCACTCATC  |
| <i>Wnt11</i>     | Forward | CAGCCTTCGTGTATGCCCTG    |  | <i>WNT11</i>     | Forward | GGAGTCGGCCTTCGTGTATG     |
| <i>Wnt11</i>     | Reverse | CCGTAGCTGAGGTTGTCCG     |  | <i>WNT11</i>     | Reverse | GCTGAGGTTGTCCGCACAT      |
| <i>Wnt2</i>      | Forward | CCTCCGAAGTAGTCGGGAATC   |  | <i>WNT2</i>      | Forward | GCCTTTGTTTATGCCATCTCCT   |
| <i>Wnt2</i>      | Reverse | GCAGGACTTTAATTCTCCTTGCC |  | <i>WNT2</i>      | Reverse | CTTGGCGCTTCCCATCTTCTT    |
| <i>Wnt2b</i>     | Forward | GACACGTCCTGGTGGTACATA   |  | <i>WNT2</i>      | Reverse | GGGTGGTACAGTTCAGCG       |
| <i>Wnt2b</i>     | Reverse | GTCTGGGTAGCGTTGACACA    |  | <i>WNT2B</i>     | Forward | GTTACCCAGACATCATGCGTT    |
| <i>Wnt3</i>      | Forward | TGGTACCCAATTTGGTGGTC    |  | <i>WNT3</i>      | Forward | GGAGAGGGACCTGGTCTACTA    |
| <i>Wnt3</i>      | Reverse | CTTACACCTTCTGCTACGCT    |  | <i>WNT3</i>      | Reverse | CTTGTGCCAAAAGGAACCCGT    |
| <i>Wnt4</i>      | Forward | TGCGAGGTAAAGACGTGCTG    |  | <i>WNT4</i>      | Forward | CTCCACACTCGACTCCTTGC     |
| <i>Wnt4</i>      | Reverse | CTTGAAGTGTGATTCCGAGG    |  | <i>WNT4</i>      | Reverse | CCGAAGAGATGGCGTACACG     |
| <i>Wnt5a</i>     | Forward | GGACCACATGCAGTACATTGG   |  | <i>WNT5A</i>     | Forward | ATTCTTGGTGGTGCCTAGGTA    |
| <i>Wnt5a</i>     | Reverse | CGTCTCTCGGCTGCCTATTT    |  | <i>WNT5A</i>     | Reverse | CGCCTTCTCCGATGTA         |
| <i>Wnt7b</i>     | Forward | CTTACCTATGCCATCACGG     |  | <i>WNT7B</i>     | Forward | GAAGCAGGGCTACTACAACCA    |
| <i>Wnt7b</i>     | Reverse | TGGTTGTAGTAGCCTTGCTTCT  |  | <i>WNT7B</i>     | Reverse | CGGCCTCATTGTTATGCAGGT    |

R.P. Hobbs et al.

**Keratin 17 regulates Aire to promote skin tumorigenesis**

**Supplementary Table 7. List of primer sets used for ChIP and mutagenesis**

| Target                    | Primer set | Forward Sequence (5'-->3') | Reverse sequence (5'-->3') |
|---------------------------|------------|----------------------------|----------------------------|
| hCxcl11                   | 1          | TCTTTAGGAACTCATTACAGGT     | CCTTTCACCCACCCTTCAT        |
|                           | 2          | TGTATAGATATGTGAAGGATGAAGGG | GATAAGAATGTGAAAGCACTGTGAA  |
|                           | 3          | GCTGGTTACCATCTGGGTTT       | GGCACAGGAATTTCCCTCTT       |
|                           | 4          | GGAAAGGTGCATGACTRCAAAG     | CAGCTTTGCTGCTCTTCTTG       |
| hCxcl10                   | 1          | GAATGGATTGCAACCTTTGTT      | ATTTCCCTCTGCTCCTCTTT       |
|                           | 2          | AAAGAGGAGCAGAGGGAAAT       | CTGATTGGATAAGGGCATTACAG    |
|                           | 3          | AGTCAACTGTAATGCCCTTATCC    | TGGAGGTTCCCTCTGCTGTA       |
| hMmp9                     | 1          | GGAAGGCATTTACTCCAGGTTA     | CAAGGATACAGTGAGCCATGAT     |
|                           | 2          | GCTGGAGTGCAGTGACATAA       | CTAAAGCCAAGACCCAAGATT      |
|                           | 3          | TTACAGGAATGAGCCACCATAAC    | TGTCCCTAAATTGATGTGAGGATTA  |
|                           | 4          | CCTCACATCAATTTAGGGACAAAG   | GCTGAATCTTCAGGGCAGTA       |
|                           | 5          | TCTAGAGGCTGCTACTGTCC       | CTCCCTGACAGCCTTCTTTG       |
|                           | 6          | AGGGAGAGGAAGCTGAGT         | CCTGAGACTTCTTTCTGAAACTAATG |
|                           | 7          | GGAGGATATCTGACCTGGGA       | GTGGGAACTGTATGAAAGGGA      |
|                           | 8          | CTGACCACTGGAGGCTTTC        | CAGTCTCCACTGCCAAGTC        |
|                           | 9          | GGTTTCTGCGGGTCTG           | TGTGTGTGTGTGTGTGTGT        |
|                           | 10         | GTGGTGTAAGCCCTTTCTCA       | TGAGGGCAGAGGTGTCT          |
| hCcl19                    | 1          | AGGGCAATCCCTCTCTCT         | CCCTTTCCTTCTGCTTTCCT       |
|                           | 2          | AGAGCAGGAGCCAAGGA          | GCCAGAGCTTCACTTTCTCTT      |
|                           | 3          | TCACAGAATGGGACATGAAGG      | GAAATGCAAGGTGTGAGTGATG     |
|                           | 4          | CATCACTCACACCTTGCATTC      | AACAGAGGCAGGCCAAC          |
| hGAPDH                    | 1          | TGAGCAGTCCGGTGTCACTA       | GGACTTTGGGAACGACTGAGATG    |
|                           | 2          | AACTTTCCCGCCTCTCA          | CAGGACACTAGGGAGTCAAG       |
|                           | 3          | TCCTTGACTCCCTAGTGTCCTG     | TAGTAGCCGGGCCCTACTTT       |
|                           | 4          | ATCGGGCCAATCTCAGT          | TCTTGAGGCCTGAGCTA          |
| K17 Lys399Ala mutagenesis |            | ACTCAGTACGCGAAAGAACC       | CAGGTGGGCATCCTCTC          |
